# Supplementary material for: Embedding Recovery to Transform Inpatient Mental Health Care: The 333 Model
Source: Atypon-hosted journal article supplement (doi:10.1176/appi.ps.201800284), 2019-04-10
Supplement: appi.ps.201800284.ds001.pdf [file appi.ps.201800284.ds001.pdf]

## Online Supplement

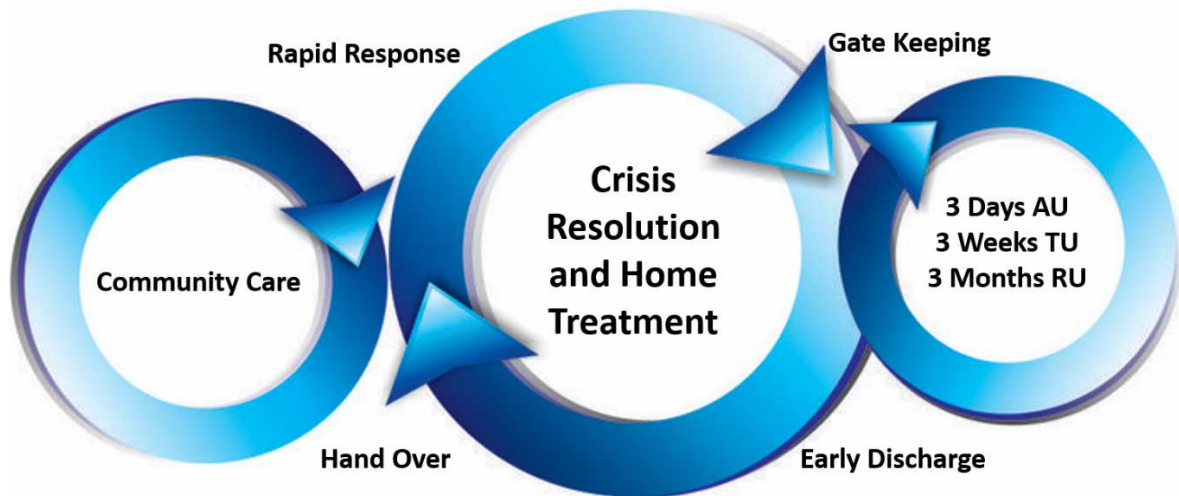

Patient flow overview of Crisis Resolution and Home Treatment Team (CRHTT): CRHTT is the principal interface between community care and the 333 inpatient system. It provides home treatment as an alternative to hospital stay and gate keeps all admissions by rapidly responding to evolving crisis in the community. CRHTT also facilitate early discharges from inpatients and supplement inpatient care with home treatment before facilitating seamless transition of care back to the community teams.

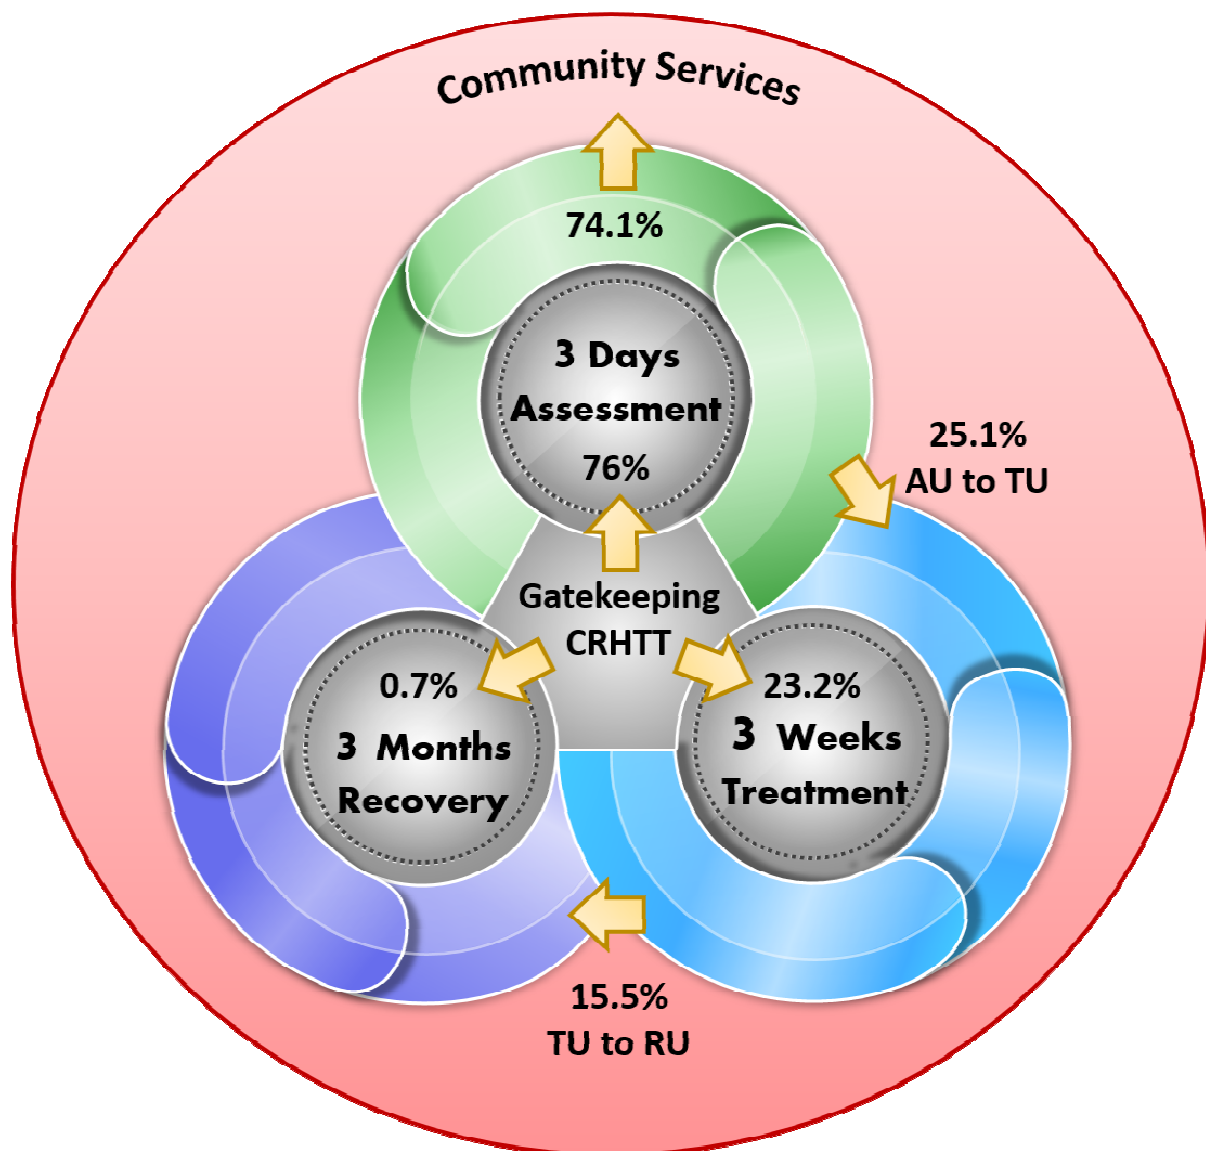

Patient flow within the 333 system with transition of care information (from Table 2): Crisis Resolution and Home Treatment Team (CRHTT) gate keep all patients. 76% get admitted to the 3 day assessment unit, 23.2% get admitted to the 3 week treatment unit (primarily involuntary patients who bypass assessment unit) and 0.7% get admitted to the 3 months recovery unit. From the assessment unit 74.1% get directly discharged to the community (primarily CRHTT) and 25.1% move forward to the treatment unit. 15.5% of patients who get admitted to the treatment unit need a further stay in the recovery unit.
