# Supplementary material for: Embedding Recovery to Transform Inpatient Mental Health Care: The 333 Model
Source: Atypon-hosted journal article supplement (doi:10.1176/appi.ps.201800284), 2019-04-10
Supplement: appi.ps.201800284.ds001.pdf [file appi.ps.201800284.ds001.pdf]

 


Psychiatry Online
